# Supplementary material for: Discovery of Geranylgeranyl Pyrophosphate Synthase (GGPPS) Paralogs from Haematococcus pluvialis Based on Iso-Seq Analysis and Their Function on Astaxanthin Biosynthesis
Source: MDPI journal article supplement (doi:10.3390/md17120696), 2019-12-12
Supplement: s1 [file s1]

**Supplementary Materials:**

**Supplemental Table S1.** Sequence characterization of *HpGGPPS* genes

| Gene       | Accession# | Length<br>(bp) | CDS<br>(bp) | Putative amino acids<br>(KDa) |
|------------|------------|----------------|-------------|-------------------------------|
| HpGGPPS1-1 | MN689792   | 1260           | 1017        | 36.45                         |
| HpGGPPS1-2 | MN689793   | 1249           | 1017        | 36.43                         |
| HpGGPPS2-1 | MN689794   | 1448           | 1272        | 45.75                         |
| HpGGPPS2-2 | MN689795   | 1455           | 1272        | 45.71                         |
| HpGGPPS3-1 | MN689796   | 1128           | 1077        | 40.71                         |
| HpGGPPS3-2 | MN689797   | 1074           | 1023        | 38.77                         |
| HpGGPPS3-3 | MN689798   | 1128           | 1077        | 40.76                         |
| HpGGPPS3-4 | MN689799   | 1011           | 960         | 36.27                         |

| Percent Identity |       |       |       |       |      |       |      |       |   |
|------------------|-------|-------|-------|-------|------|-------|------|-------|---|
|                  | 1     | 2     | 3     | 4     | 5    | 6     | 7    | 8     |   |
| 1                |       | 98.6  | 45.3  | 45.2  | 48.1 | 47.5  | 48.4 | 48.5  | 1 |
| 2                | 1.4   |       | 44.9  | 44.8  | 48.3 | 47.8  | 48.6 | 48.7  | 2 |
| 3                | 100.2 | 102.2 |       | 97.4  | 40.3 | 40.1  | 40.2 | 40.0  | 3 |
| 4                | 100.6 | 102.6 | 2.7   |       | 40.3 | 40.1  | 40.1 | 39.9  | 4 |
| 5                | 90.4  | 89.6  | 125.4 | 124.7 |      | 100.0 | 99.1 | 99.2  | 5 |
| 6                | 92.6  | 91.3  | 126.5 | 125.9 | 0.0  |       | 99.1 | 99.2  | 6 |
| 7                | 89.3  | 88.6  | 126.0 | 126.0 | 0.9  | 0.9   |      | 100.0 | 7 |
| 8                | 89.3  | 88.5  | 128.1 | 128.0 | 0.8  | 0.8   | 0.0  |       | 8 |
|                  | 1     | 2     | 3     | 4     | 5    | 6     | 7    | 8     |   |

**Supplemental Figure S1.** Sequence similarity and divergence of eight *HpGGPPS* genes in the coding region. The alignment was performed by Clustal W using MegAlign module in the DNASTAR software.

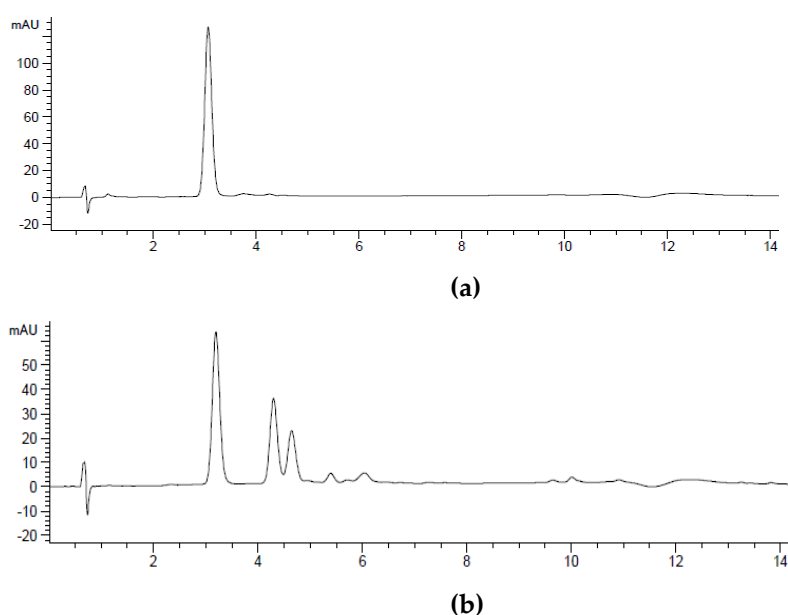

**Supplemental FigureS2.** The HPLC chromatograms of pigments extracted from transformed *E. coli* cells. (a) the profile of standard astaxanthin purchased from

Aladdin Chemistry Co. Ltd (Shanghai, China); (b) an representative profile of the extracted pigment from *E. coli* harboring HpGGPP genes and CrtE gene.
